# Supplementary material
Source: Royal Society of Chemistry journal article supplement (doi:10.1039/d6ta00414h)
Supplement: d6ta00414h1.pdf [file d6ta00414h1.pdf]

## Supplementary Information

### **Multifunctional Z-scheme Bi-MOF/g-C<sub>3</sub>N<sub>4</sub> photocatalyst for pharmaceutical degradation, hydrogen evolution, and electricity generation**

Sri Vanaja <sup>ab</sup>, Esakkinaveen Dhanaraman <sup>a</sup>, Atul Verma <sup>a</sup>, Sathish Kumar <sup>b</sup>,  
Tanay Kundu<sup>b\*</sup>, Yen-Pei Fu <sup>a\*</sup>

<sup>a</sup> Department of Materials Science and Engineering, National Dong Hwa University, Shou-Feng, Hualien 97401, Taiwan

<sup>b</sup> Department of Chemistry, SRM Institute of Science and Technology, Kattankulathur, Tamil Nadu 603203, India

\*Corresponding authors

E-mail addresses: [tanayk@srmist.edu.in](mailto:tanayk@srmist.edu.in) (T Kundu) ; [ypfu@gms.ndhu.edu.tw](mailto:ypfu@gms.ndhu.edu.tw) (Y-P Fu)

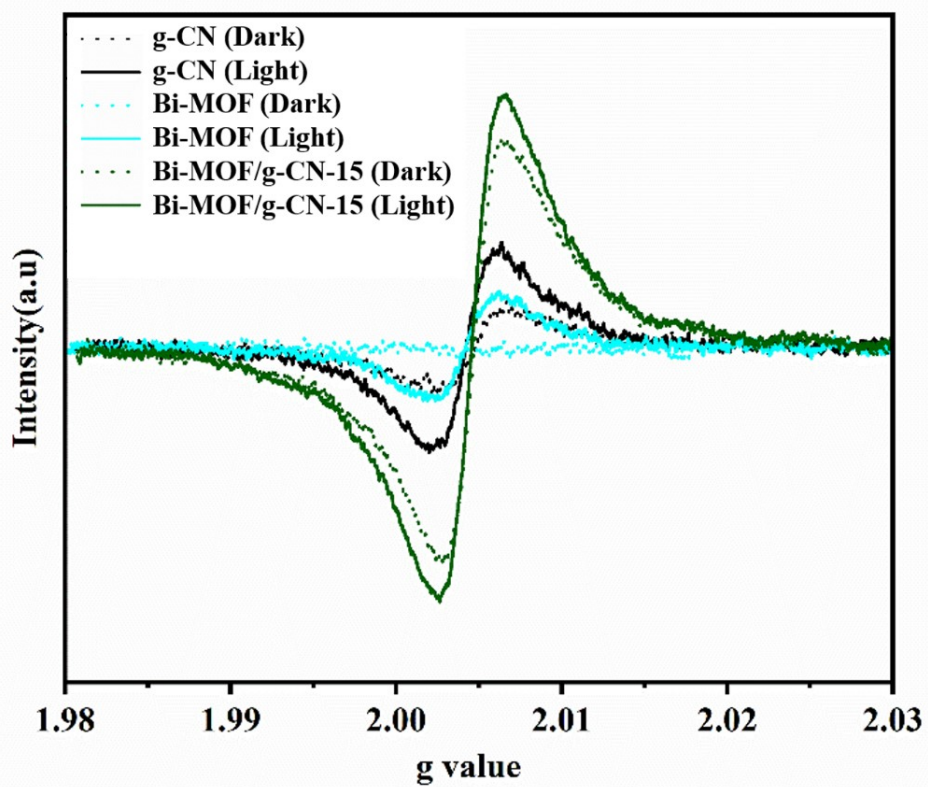

Fig. S1. EPR for g-CN, Bi-MOF and Bi-MOF/g-CN-15.

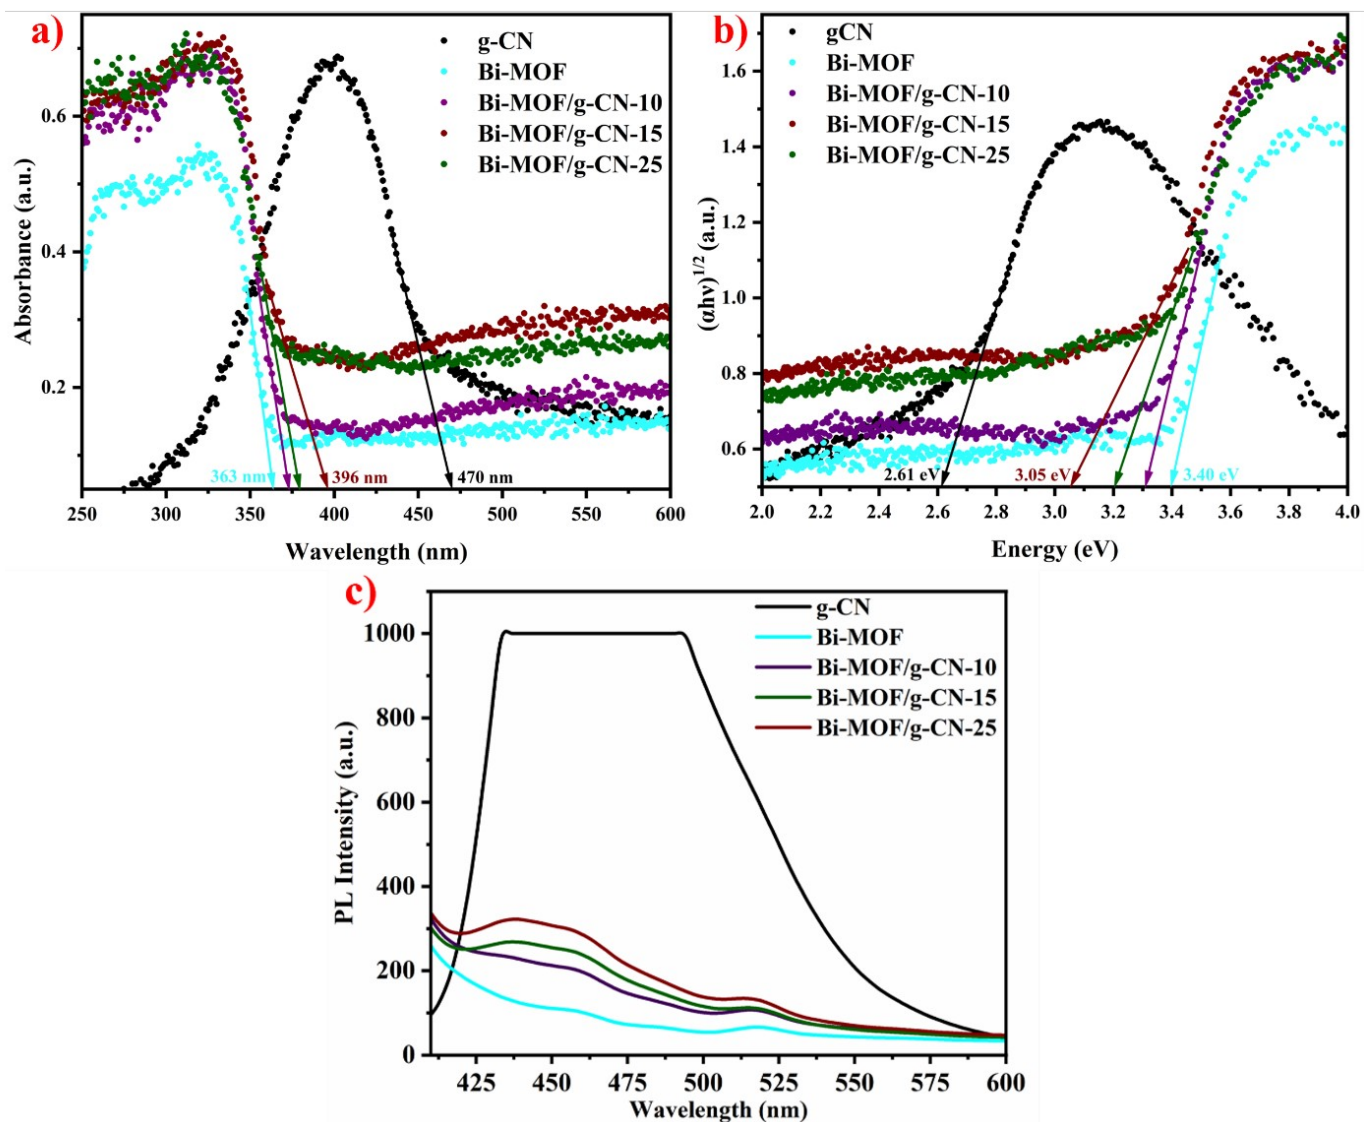

**Fig. S2.** (a) UV-DRS absorption, (b) Band gap calculation, and (c) Photoluminescence spectra g-CN, Bi-MOF, and Bi-MOF/g-CN-15.

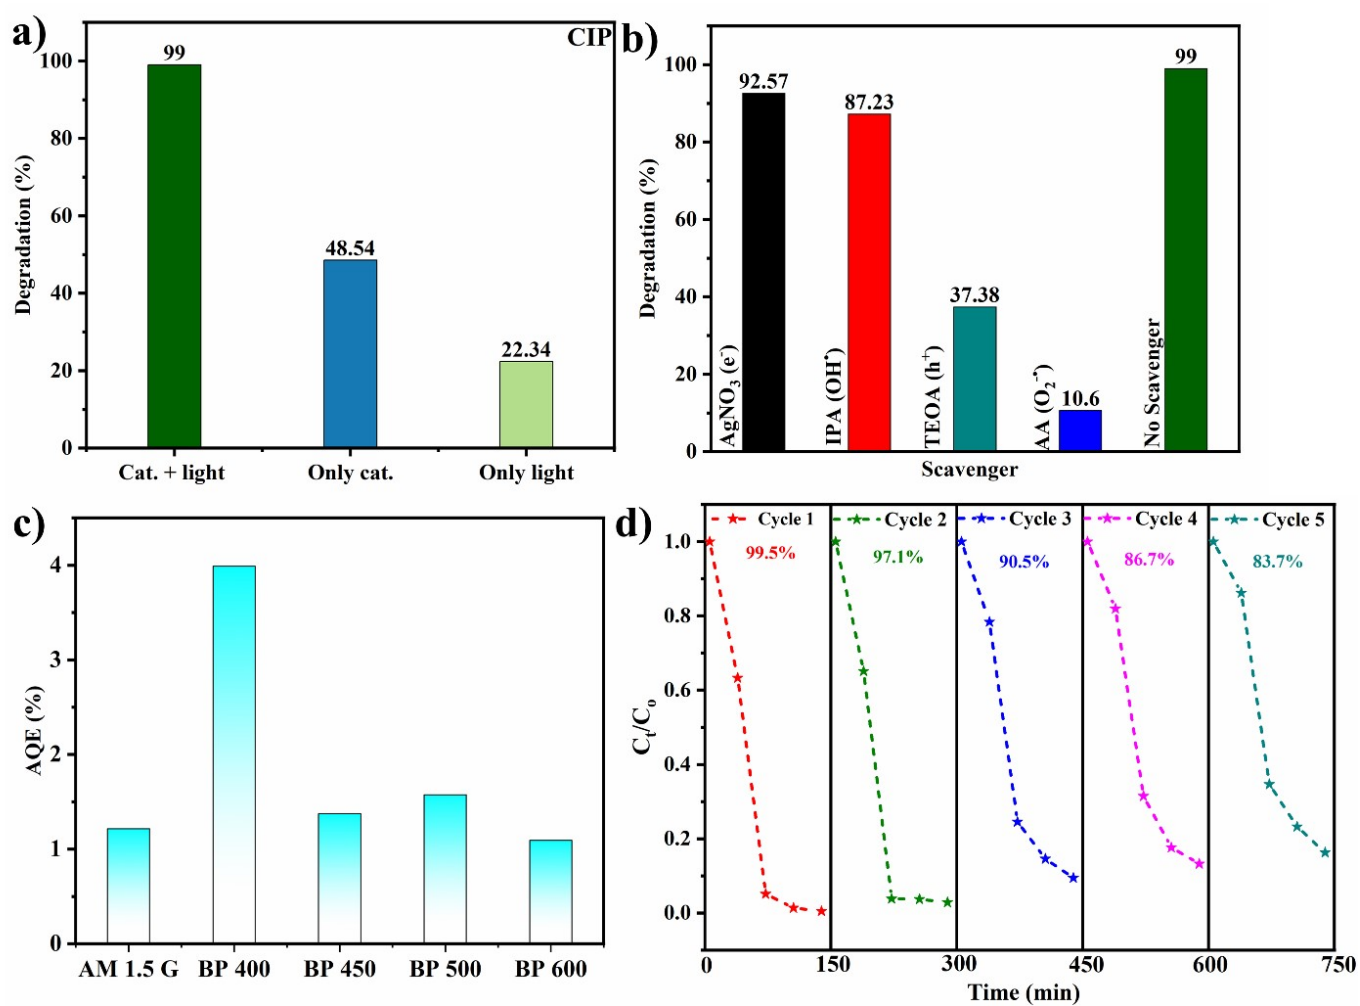

**Fig. S3.** CIP degradation (a) Control experiment, (b) Effect of scavengers, (c) Apparent quantum efficiencies, and (d) Recycle experiments for g-CN, Bi-MOF, and Bi-MOF/g-CN-15.

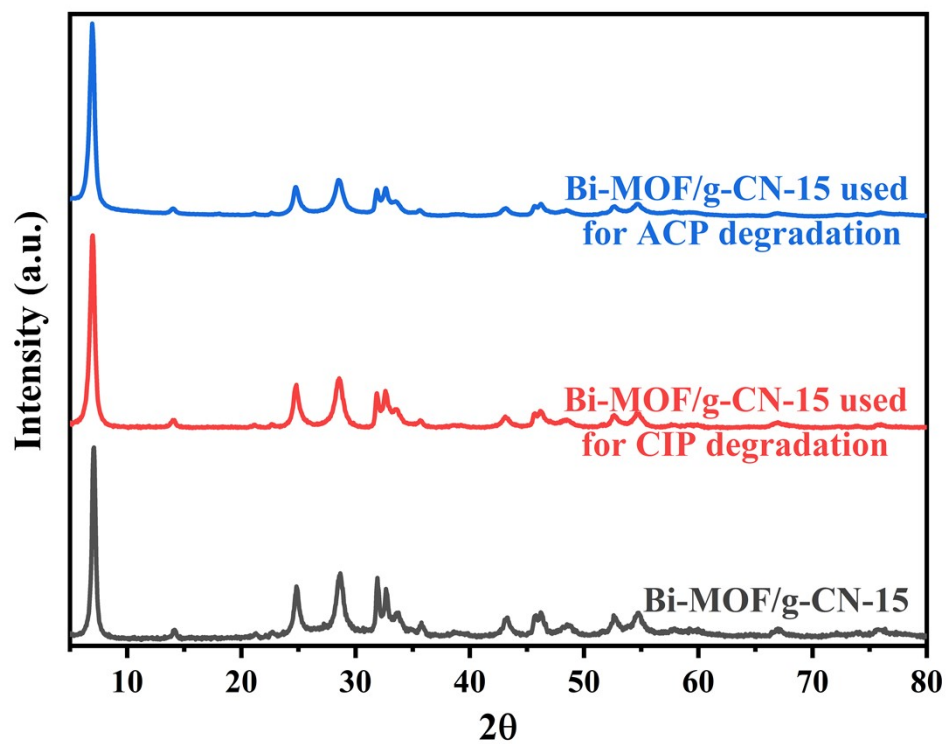

Fig. S4. PXRD of Bi-MOF/g-CN-15 before and after photodegradation.

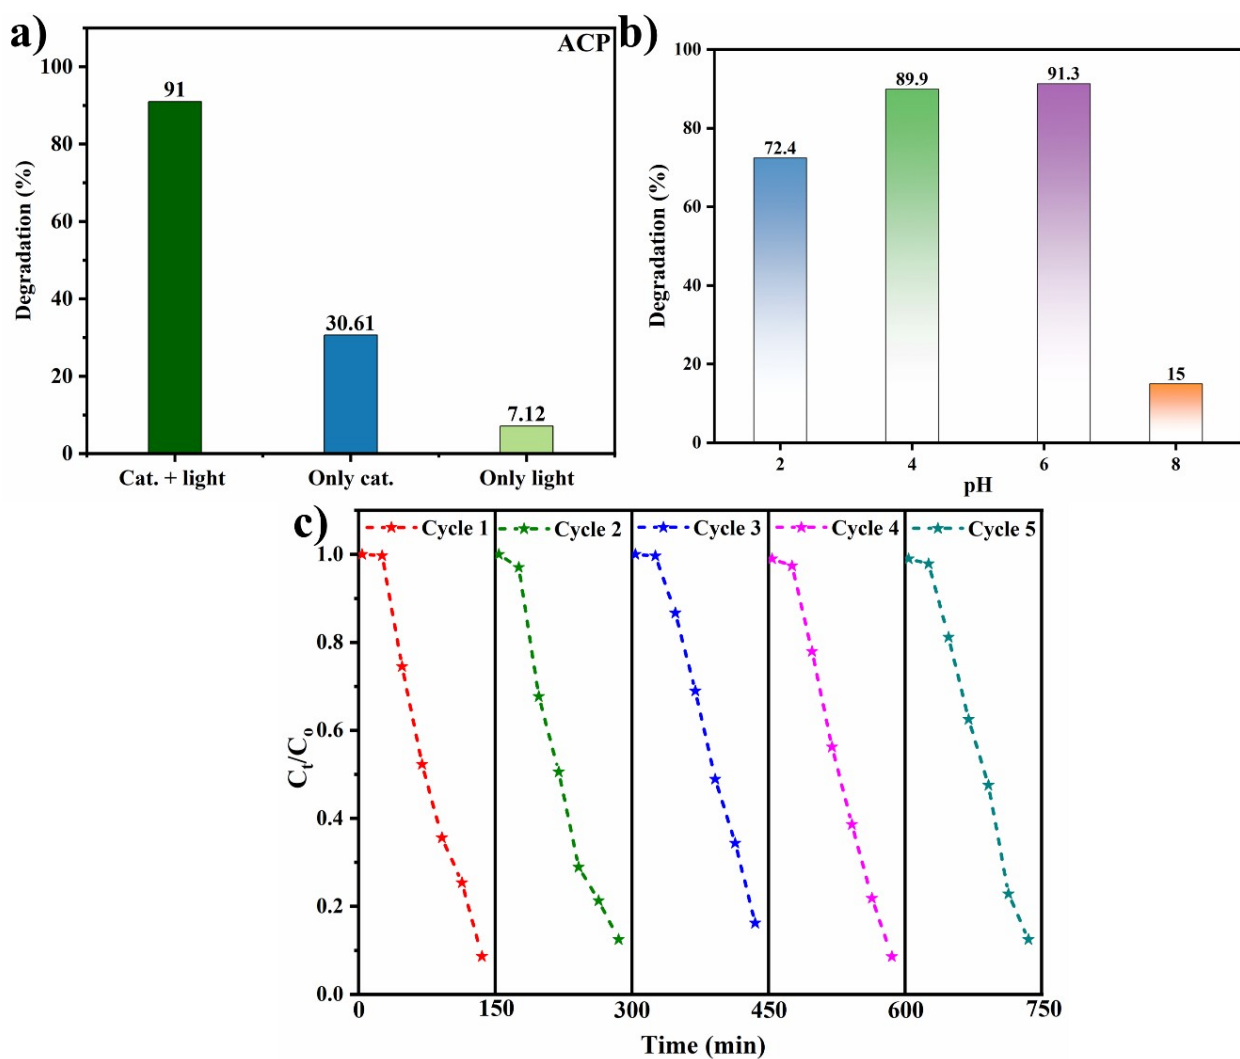

**Fig. S5.** ACP degradation (a) Control experiment, (b) Effect of pH, (c) Recycle experiments for g-CN, Bi-MOF, and Bi-MOF/g-CN-15.

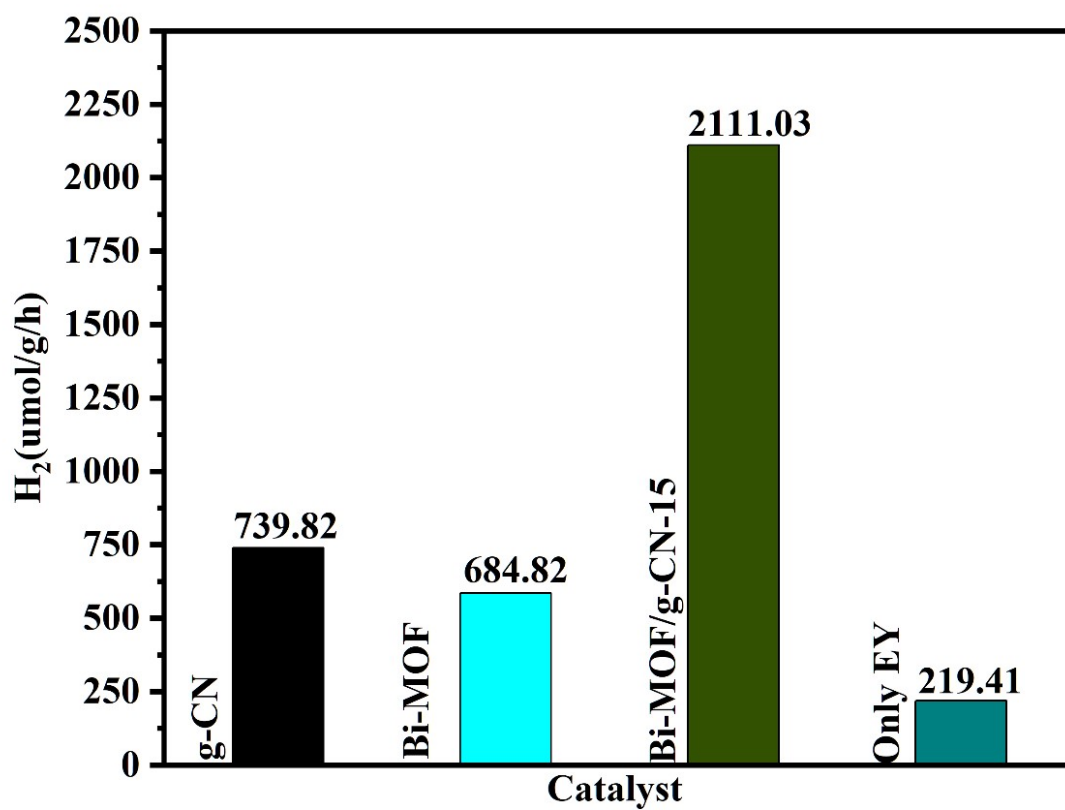

Fig. S6. H<sub>2</sub> production for g-CN, Bi-MOF, Bi-MOF/g-CN-15, and EY.

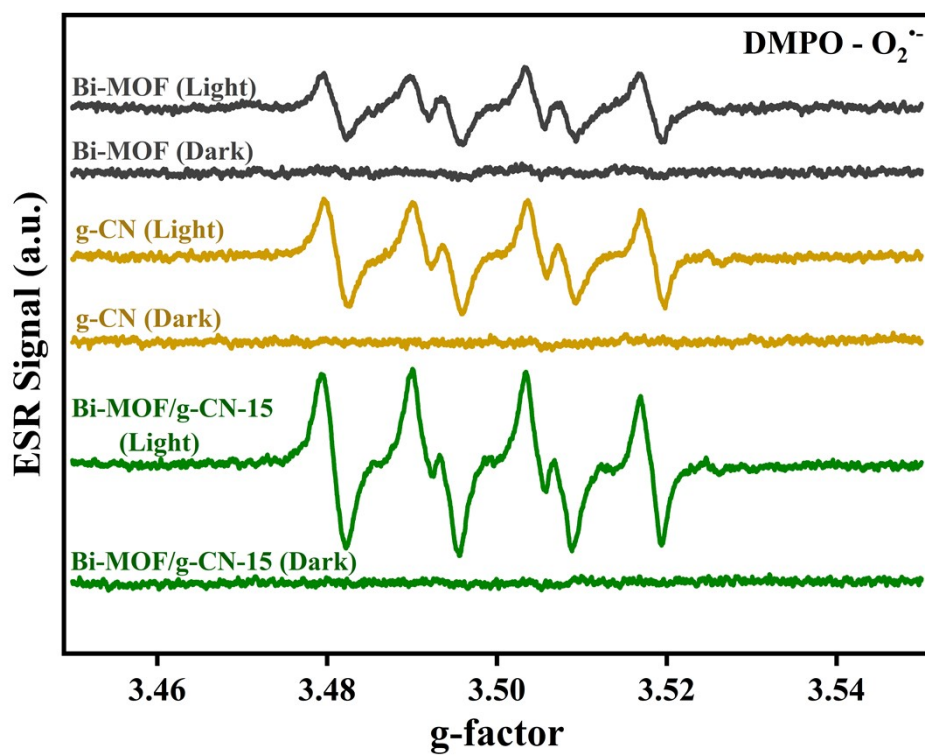

**Fig. S7.** ESR spin trapping for superoxide radicals for g-CN, Bi-MOF, and Bi-MOF/g-CN-15.
